# Supplementary material for: Blood Cytokine Analysis Suggests That SARS-CoV-2 Infection Results in a Sustained Tumour Promoting Environment in Cancer Patients
Source: MDPI journal article supplement (doi:10.3390/cancers13225718), 2021-11-15
Supplement: s1 [file s1]

**Supplementary Table S1: Patient characteristics\***

|                                 | Solid cancer (n = 68) |                    | Haematological cancer (n = 38) |                    | HCW (n = 57)         |                    |
|---------------------------------|-----------------------|--------------------|--------------------------------|--------------------|----------------------|--------------------|
|                                 | n (%) or mean (SD)    |                    | n (%) or mean (SD)             |                    | n (%) or mean (SD)   |                    |
|                                 | Exposed <sup>a</sup>  | Unexp <sup>b</sup> | Exposed <sup>a</sup>           | Unexp <sup>b</sup> | Exposed <sup>a</sup> | Unexp <sup>b</sup> |
| Sleep apnoea                    | 3 (8.3%)              | 1 (3.1%)           | 1 (6.3%)                       | 0 (0%)             | 0 (0%)               | 1 (2.4%)           |
| Cardiovascular disease          | 3 (8.3%)              | 6 (18.8%)          | 2 (12.5%)                      | 3 (9.4%)           | 1 (6.7%)             | 0 (0%)             |
| Thromboembolic disease          | 2 (5.6%)              | 3 (9.4%)           | 2 (12.5%)                      | 1 (3.1%)           | 0 (0%)               | 0 (0%)             |
| Renal disease                   | 1 (2.8%)              | 1 (3.1%)           | 1 (6.3%)                       | 0 (0%)             | 0 (0%)               | 0 (0%)             |
| Pulmonary disease               | 7 (19.4%)             | 2 (6.3%)           | 4 (25.0%)                      | 1 (3.1%)           | 4 (26.7%)            | 3 (7.1%)           |
| Diabetes                        | 6 (16.7%)             | 2 (6.3%)           | 1 (6.3%)                       | 0 (0%)             | 0 (0%)               | 0 (0%)             |
| Metabolic disease               | 4 (11.1%)             | 3 (9.4%)           | 1 (6.3%)                       | 2 (6.3%)           | 1 (6.7%)             | 3 (7.1%)           |
| Hypertension                    | 6 (16.7%)             | 5 (15.6%)          | 3 (18.8%)                      | 3 (9.4%)           | 1 (6.7%)             | 1 (2.4%)           |
| Infection                       | 5 (13.9%)             | 6 (18.8%)          | 4 (25.0%)                      | 7 (21.9%)          | 0 (0%)               | 2 (4.8%)           |
| Allergic constitution           | 2 (5.6%)              | 0 (0%)             | 0 (0%)                         | 1 (3.1%)           | 1 (6.7%)             | 3 (7.1%)           |
| Gastrointestinal disease        | 2 (5.6%)              | 6 (18.8%)          | 4 (25.0%)                      | 3 (9.4%)           | 0 (0%)               | 4 (9.5%)           |
| Autoimmune disorder             | 3 (8.3%)              | 0 (0%)             | 1 (6.3%)                       | 1 (3.1%)           | 1 (6.7%)             | 2 (4.8%)           |
| Recent non-COVID-19 vaccination | 0 (0%)                | 1 (3.1%)           | 0 (0%)                         | 0 (0%)             | 0 (0%)               | 0 (0%)             |
| Epileptic & neurologic disorder | 1 (2.8%)              | 1 (3.1%)           | 1 (6.3%)                       | 1 (3.1%)           | 1 (6.7%)             | 0 (0%)             |
| Bone disorders                  | 0 (0%)                | 0 (0%)             | 0 (0%)                         | 1 (3.1%)           | 0 (0%)               | 0 (0%)             |

\* Consult Table 1 in main text for other patient variables

HCWs: Health care workers

SD: standard deviation

<sup>a</sup>All exposed individuals were selected

<sup>b</sup>Unexposed individuals were group-matched to exposed individuals based on age, gender and cancer type in case of cancer patients

**Supplementary Table S2:** Overview of all patients with information on cancer types, topography, morphology and behaviour of the malignancy. Last column represents the exposure to SARS-CoV-2 confirmed by either PCR or positive serology.

|                                 | Cancer type                                                                                   | Topography | Morphology | Behaviour | Gender | Age | SARS-CoV-2-Exposed |
|---------------------------------|-----------------------------------------------------------------------------------------------|------------|------------|-----------|--------|-----|--------------------|
| <b>Carcinomas</b>               |                                                                                               |            |            |           |        |     |                    |
| <b>Head and neck cancer</b>     | Squamous cells head and neck cancer                                                           | C01.9      | 8070       | 3         | M      | 57  | Yes                |
|                                 | Malignant neoplasm of ventral surface of tongue                                               | C02.2      | NA         | NA        | M      | 72  | Yes                |
|                                 | Squamous cells in tonsils                                                                     | C09.8      | 8070       | 3         | M      | 56  | Yes                |
|                                 | Squamous cells in oropharynx                                                                  | C10.9      | 8070       | 3         | F      | 69  | No                 |
|                                 | Squamous cells in oropharynx                                                                  | C10.9      | 8070       | 3         | M      | 64  | Yes                |
|                                 | Squamous cells in oropharynx, HPV-positive                                                    | C10.9      | 8085       | 3         | M      | 67  | Yes                |
|                                 | Squamous cells in nasopharynx                                                                 | C11.9      | 8070       | 3         | M      | 54  | No                 |
|                                 | Epithelial carcinoma in nasopharynx                                                           | C11.9      | 8010       | 3         | M      | 67  | Yes                |
|                                 | Squamous cells in hypopharynx                                                                 | C13.9      | 8070       | 3         | M      | 66  | No                 |
| <b>Gastric cancer</b>           | Malignant neoplasm of esophagus                                                               | C15.1      | NA         | NA        | F      | 69  | Yes                |
|                                 | Squamous cell carcinoma in esophagus, also malignancy in lower respiratory tract and prostate | C15.5      | 8070       | 3         | M      | 62  | Yes                |
|                                 | Stromal carcinoma in the pyloric antrum                                                       | C16.3      | 8936       | 3         | F      | 75  | Yes                |
|                                 | Adenocarcinoma of the gastric cardium                                                         | C16.0      | 8144       | 3         | F      | 72  | Yes                |
|                                 | Malignant neoplasm of ceacum                                                                  | C18.0      | NA         | 3         | F      | 71  | Yes                |
|                                 | Combined carcinoid and adenocarcinoid of ascending colon                                      | C18.2      | 8244       | 3         | M      | 68  | Yes                |
|                                 | Adenocarcinoma of ascending colon                                                             | C18.2      | 8140       | 3         | F      | 76  | Yes                |
|                                 | Adenocarcinoma of sigmoid colon                                                               | C18.7      | 8140       | 3         | M      | 49  | No                 |
|                                 | Adenocarcinoma of rectosigmoid junction                                                       | C19.9      | 8140       | 3         | M      | 63  | Yes                |
|                                 | Adenocarcinoma of rectum                                                                      | C20.9      | 8140       | 3         | M      | 63  | Yes                |
| <b>Hepatobiliary cancer</b>     | Intrahepatic bile duct cholangiocarcinoma                                                     | C22.1      | 8160       | 3         | F      | 65  | No                 |
|                                 | Extrahepatic bile duct cholangiocarcinoma                                                     | C24.0      | 8160       | 3         | F      | 54  | Yes                |
| <b>Pancreatic cancer</b>        | Adenocarcinoma of head of pancreas                                                            | C25.0      | 8140       | 3         | M      | 56  | No                 |
|                                 | Adenocarcinoma of body of pancreas                                                            | C25.1      | 8140       | 3         | M      | 67  | Yes                |
| <b>Respiratory tract cancer</b> | Squamous cell carcinoma of the glottis, also prostate cancer                                  | C32.0      | 8070       | 3         | M      | 72  | No                 |
|                                 | Squamous cell and atypical carcinoid tumour of the lung                                       | C34.1      | 8249       | 3         | M      | 68  | No                 |
|                                 | Squamous cell carcinoma of the lung                                                           | C34.1      | 8070       | 3         | M      | 67  | No                 |
|                                 | Adenocarcinoma of the lung                                                                    | C34.9      | 8140       | 3         | M      | 67  | Yes                |
|                                 | Thymoma NOS                                                                                   | C37.9      | 8580       | 3         | F      | 56  | Yes                |
|                                 | Malignant neoplasm of thymus                                                                  | C37.9      | NA         | NA        | F      | 60  | Yes                |
| <b>Breast cancer</b>            | Secretory carcinoma of central portion of breast                                              | C50.1      | 8502       | 3         | F      | 75  | Yes                |
|                                 | Intraductal and lobular carcinoma of central portion of breast                                | C50.1      | 8522       | 3         | F      | 54  | Yes                |
|                                 | Intraductal carcinoma of upper-inner quadrant of breast                                       | C50.2      | 8500       | 3         | F      | 54  | No                 |
|                                 | Intraductal carcinoma of upper-outer quadrant of breast                                       | C50.4      | 8500       | 3         | F      | 61  | Yes                |
|                                 | Intraductal carcinoma of upper-outer quadrant of breast                                       | C50.4      | 8500       | 3         | F      | 60  | No                 |
|                                 | Intraductal carcinoma of upper-outer quadrant of breast                                       | C50.4      | 8500       | 3         | F      | 35  | Yes                |
|                                 | Intraductal carcinoma of upper-outer quadrant of breast                                       | C50.4      | 8500       | 3         | F      | 62  | Yes                |
|                                 | Intraductal carcinoma of upper-outer quadrant of breast                                       | C50.4      | 8500       | 3         | F      | 63  | No                 |
|                                 | Intraductal carcinoma of upper-outer quadrant of breast                                       | C50.4      | 8500       | 3         | F      | 44  | No                 |
|                                 | Lobular carcinoma of upper-outer quadrant of breast                                           | C50.4      | 8520       | 3         | F      | 55  | Yes                |
|                                 | Intraductal carcinoma of overlapping sites of breast                                          | C50.8      | 8500       | 3         | F      | 65  | No                 |
|                                 | Intraductal carcinoma of breast of unspecified site                                           | C50.9      | 8500       | 3         | F      | 52  | No                 |
|                                 | Intraductal carcinoma of breast of unspecified site                                           | C50.9      | 8500       | 3         | F      | 66  | No                 |
|                                 | Intraductal carcinoma of breast of unspecified site                                           | C50.9      | 8500       | 3         | F      | 57  | Yes                |
|                                 | Intraductal carcinoma of breast of unspecified site                                           | C50.9      | 8500       | 3         | F      | 42  | Yes                |
|                                 | Intraductal carcinoma of breast of unspecified site                                           | C50.9      | 8500       | 3         | F      | 42  | No                 |

|                                         |                                                                     |        |      |    |   |    |     |
|-----------------------------------------|---------------------------------------------------------------------|--------|------|----|---|----|-----|
| <b>Female reproductive organ cancer</b> | Adenocarcinoma of the endocervix                                    | C53.0  | 8140 | 3  | F | 47 | Yes |
|                                         | Squamous cells of the exocervix                                     | C53.1  | 8070 | 3  | F | 43 | No  |
|                                         | Adenocarcinoma of the endometrium                                   | C54.1  | 8380 | 3  | F | 73 | Yes |
|                                         | Ovarian cancer                                                      | C56    | NA   | NA | F | 60 | No  |
| <b>Prostate cancer</b>                  | Malignant neoplasm of prostate                                      | C61    | NA   | NA | M | 70 | No  |
|                                         | Adenocarcinoma of the prostate                                      | C61.9  | 8140 | 3  | M | 66 | No  |
|                                         | Adenocarcinoma of the prostate                                      | C61.9  | 8140 | 3  | M | 60 | No  |
|                                         | Adenocarcinoma of the prostate                                      | C61.9  | 8140 | 3  | M | 84 | No  |
|                                         | Malignant neoplasm of prostate                                      | C61.9  | NA   | NA | M | 80 | Yes |
| <b>Kidney cancer</b>                    | clear cell mesonephroid carcinoma of the kidney                     | C64.9  | 8310 | 3  | F | 70 | No  |
|                                         | clear cell mesonephroid carcinoma of the kidney                     | C64.9  | 8310 | 3  | M | 53 | Yes |
|                                         | clear cell mesonephroid carcinoma of the kidney                     | C64.9  | 8310 | 3  | M | 53 | No  |
| <b>Bladder cancer</b>                   | large cell neuroendocrine carcinoma of the bladder                  | C67.9  | 8013 | 3  | F | 67 | Yes |
| <b>Brain cancer</b>                     | Glioblastoma in the temporal lobe                                   | C71.2  | 9440 | 3  | M | 52 | No  |
|                                         | Carcinoma in the pineal gland                                       | C75.3  | NA   | NA | M | 16 | Yes |
| <b>Sarcomas and melanomas</b>           |                                                                     |        |      |    |   |    |     |
| <b>Mesothelioma</b>                     | Epithelioid mesothelioma                                            | C38.4  | 9052 | 3  | F | 64 | No  |
|                                         | Biphasic mesothelioma                                               | C38.4  | 9053 | 3  | M | 76 | No  |
|                                         | Unclassified Mesothelioma                                           | C45.0  | NA   | NA | M | 69 | No  |
| <b>Other sarcomas</b>                   | Tenosynovial giant cell tumour in the short bones of the lower limb | C40.3  | 9252 | NA | M | 32 | Yes |
|                                         | Differentiated liposarcoma of the peritoneum                        | C48.0  | 8858 | 3  | F | 51 | Yes |
|                                         | Squamous cell carcinoma of other connective and soft tissue         | C49    | 8070 | 3  | M | 73 | Yes |
|                                         | Ewing's sarcoma                                                     | C49.2  | 9260 | 3  | M | 17 | No  |
|                                         | Reticulum cell sarcoma                                              | C69.4  | 9591 | 3  | F | 70 | No  |
| <b>Melanoma</b>                         | Malignant melanoma                                                  | C44.5  | 8720 | 3  | F | 58 | No  |
|                                         | Superficial spreading melanoma                                      | C44.4  | 8743 | 3  | M | 88 | No  |
|                                         | Malignant melanoma of the eye                                       | C69.4  | 8720 | 3  | F | 36 | Yes |
| <b>Haematological malignancies</b>      |                                                                     |        |      |    |   |    |     |
| <b>Lymphoma</b>                         | Mantle cell lymphoma                                                | C07.9  | 9673 | 3  | F | 66 | Yes |
|                                         | Burkitt Lymphoma                                                    | C34.1  | 9680 | 3  | F | 32 | No  |
|                                         | Thymic large B-cell lymphoma                                        | C37.9  | 9679 | 3  | M | 59 | No  |
|                                         | Mantle cell lymphoma                                                | C38.1  | 9673 | 3  | F | 52 | Yes |
|                                         | B-cell lymphoma in the splenic marginal zone                        | C42.1  | 9689 | 3  | M | 82 | No  |
|                                         | B-cell lymphoma in the splenic marginal zone                        | C42.2  | 9689 | 3  | F | 47 | Yes |
|                                         | B-lymphoblastic lymphoma                                            | C42.1  | 9811 | 3  | M | 30 | No  |
|                                         | B-lymphoblastic lymphoma                                            | C42.1  | 9811 | 3  | M | 6  | No  |
|                                         | B-lymphoblastic lymphoma with hyper diploidy                        | C42.1  | 9815 | 3  | F | 26 | Yes |
|                                         | B-lymphoblastic lymphoma with hyper diploidy                        | C42.1  | 9815 | 3  | F | 26 | No  |
|                                         | Hodgkin lymphoma                                                    | C50    | NA   | NA | F | 54 | Yes |
|                                         | Hodgkin lymphoma                                                    | C77.1  | 9659 | 3  | F | 56 | Yes |
|                                         | Burkitt lymphoma                                                    | C77.8  | 9680 | 3  | M | 45 | No  |
|                                         | Follicular lymphoma                                                 | C77.8  | 9690 | 3  | F | 68 | No  |
|                                         | Burkitt lymphoma                                                    | C77.9  | 9680 | 3  | M | 71 | No  |
|                                         | Diffuse large B-cell lymphoma                                       | C83.3  | 9680 | 3  | M | 37 | yes |
|                                         | Diffuse large B-cell lymphoma                                       | C83.3  | 9680 | 3  | V | 62 | yes |
| <b>Multiple Myeloma</b>                 | Multiple myeloma                                                    | C42    | 9732 | 3  | F | 75 | Yes |
|                                         | Multiple myeloma                                                    | C42.1  | 9732 | 3  | M | 58 | Yes |
|                                         | Multiple myeloma                                                    | C42.1  | 9732 | 3  | F | 53 | No  |
|                                         | Multiple myeloma                                                    | C 90.0 | NA   | NA | M | 63 | yes |
|                                         | Multiple myeloma                                                    | C 90.0 | NA   | NA | M | 58 | yes |

|               |                                                  |       |      |   |   |    |     |
|---------------|--------------------------------------------------|-------|------|---|---|----|-----|
| Leukaemia     | B-cell chronic lymphocytic leukemia              | C42.1 | 9823 | 3 | F | 65 | No  |
|               | Precursor T-cell lymphoblastic leukemia          | C42.1 | 9837 | 3 | M | 37 | No  |
|               | Acute myeloid leukemia                           | C42.1 | 9861 | 3 | M | 54 | No  |
|               | Chronic myeloid leukemia, BCR/ABL-positive       | C42.1 | 9875 | 3 | F | 23 | No  |
|               | Chronic myeloid leukemia, BCR/ABL-positive       | C92.1 | 9875 | 3 | M | 69 | Yes |
|               | Chronic myelomonocytic leukemia                  | C42.1 | 9945 | 3 | M | 68 | No  |
|               | Primary myelofibrosis                            | C42.1 | 9961 | 3 | M | 51 | Yes |
|               | Myoproliferative neoplasm unclassifiable         | C42.1 | 9975 | 3 | F | 66 | No  |
| Non-cancerous | Refractory anemia with ring sideroblasts         | C42.1 | 9982 | 3 | F | 72 | Yes |
|               | Refractory anemia with excess blasts             | C42.1 | 9983 | 3 | M | 54 | No  |
|               | Refractory anemia with excess blasts             | C42.1 | 9983 | 3 | M | 68 | No  |
|               | Refractory anemia with excess blasts             | C42.1 | 9983 | 3 | F | 65 | No  |
|               | Refractory cytopenia with multilineage dysplasia | C42.1 | 9985 | 3 | M | 52 | No  |

**Supplementary Table S3:** Alterations in CCGs for unexposed solid and haematological malignancy patients compared to unexposed healthcare workers (HCWs). The table represents the p-values and fold changes with one-way ANOVA between the three groups followed by pair wise comparisons with post-hoc Tukey correction for multiple comparisons.

| CCG upregulated | <i>P</i> ANOVA | Solid cancer vs HCW           |                | Haematological cancer vs HCW  |                |
|-----------------|----------------|-------------------------------|----------------|-------------------------------|----------------|
|                 |                | Fold Change Increase (95% CI) | <i>P</i> Tukey | Fold Change Increase (95% CI) | <i>P</i> Tukey |
| TNF- $\alpha$   | < 0.001**      | 1.3 (1.2 - 1.5)               | < 0.001        | 1.3 (1.1-1.5)                 | 0.002          |
| IL-6            | < 0.001**      | 1.9 (1.6 - 2.3)               | < 0.001        | 1.6 (1.3-2.0)                 | < 0.001        |
| IL-1Ra          | 0.002**        | 1.6 (1.2 - 2.1)               | 0.003          | 1.5 (1.1-2.0)                 | 0.04           |
| IL-8            | 0.008**        | 1.8 (1.3 - 2.7)               | 0.007          | 1.5 (0.9-2.2)                 | ns             |
| CRP             | 0.002**        | 2.3 (1.5 - 3.6)               | 0.002          | 1.3 (0.8-2.2)                 | ns             |
| SAA             | < 0.001**      | 2.6 (1.6 - 4.1)               | < 0.001        | 1.2 (0.7-2.0)                 | ns             |
| IFN- $\gamma$   | < 0.001**      | 5.1 (3.3 - 7.9)               | < 0.001        | 8.1 (5.0-13.2)                | < 0.001        |
| IL-18           | 0.029**        | 1.3 (1.0-1.7)                 | ns             | 1.5 (1.1-2.0)                 | 0.04           |
| IL-17A          | < 0.001**      | 1.8 (1.5 - 2.2)               | < 0.001        | 1.7 (1.3-2.1)                 | < 0.001        |
| IL-22           | < 0.001**      | 1.2 (1.1 - 1.4)               | 0.011          | 1.3 (1.1-1.5)                 | 0.001          |
| IL-33           | 0.002**        | 1.1 (1.0 - 1.2)               | 0.003          | 1.1 (1.0-1.1)                 | 0.032          |
| IL-5            | 0.006**        | 1.4 (1.1 - 1.6)               | 0.005          | 1.1 (0.9-1.4)                 | ns             |
| TSLP            | < 0.001**      | 1.8 (1.5 - 2.1)               | < 0.001        | 1.4 (1.1-1.7)                 | 0.011          |
| IL-9            | < 0.001**      | 1.4 (1.2 - 1.6)               | < 0.001        | 1.2 (1.1-1.4)                 | 0.013          |
| IL-21           | 0.017**        | 1.4 (1.1 - 1.9)               | 0.018          | 1.3 (1.0-1.7)                 | ns             |
| Eotaxin         | 0.043          | 1.3 (1.1 - 1.7)               | 0.037          | 1.1 (0.9-1.4)                 | ns             |
| IL-10           | < 0.001**      | 1.3 (1.2 - 1.4)               | < 0.001        | 1.2 (1.1-1.4)                 | < 0.001        |
| IL-2R $\alpha$  | 0.002**        | 1.5 (1.2-1.9)                 | 0.002          | 1.3 (1.0-1.7)                 | ns             |
| IL-15           | 0.004**        | 1.2 (1.0-1.4)                 | 0.032          | 1.3 (1.1-1.5)                 | 0.009          |
| VEGF-A          | 0.039          | 1.8 (1.2-3.0)                 | 0.034          | 1.3 (0.7-2.1)                 | ns             |
| bFGF            | 0.056          | 2.7 (1.2-6.0)                 | 0.048          | 1.4 (0.6-3.5)                 | ns             |
| PlGF            | < 0.001**      | 1.4 (1.2-1.7)                 | 0.001          | 1.5 (1.2-1.8)                 | 0.002          |
| Flt-1           | 0.027**        | 1.3 (1.1-1.6)                 | 0.031          | 1.2 (1.0-1.5)                 | ns             |
| EPO             | < 0.001**      | 2.1 (1.5-2.8)                 | < 0.001        | 2.3 (1.6-3.2)                 | < 0.001        |
| sICAM-1         | 0.017**        | 1.1 (1.0-1.1)                 | 0.031          | 1.1 (1.0-1.1)                 | ns             |
| G-CSF           | < 0.001**      | 1.8 (1.4-2.4)                 | < 0.001        | 1.7 (1.2-2.2)                 | 0.003          |
| M-CSF           | < 0.001**      | 1.5 (1.2-1.8)                 | 0.001          | 1.3 (1.1-1.7)                 | 0.033          |
| GM-CSF          | 0.015**        | 1.1 (1.0-1.1)                 | 0.015          | 1.0 (1.0-1.1)                 | ns             |
| MCP-1           | < 0.001**      | 1.7 (1.4-2.0)                 | < 0.001        | 1.6 (1.4-1.9)                 | < 0.001        |

|                                 |           |                |       |                |       |
|---------------------------------|-----------|----------------|-------|----------------|-------|
| <b>MCP-2</b>                    | 0.003**   | 1.3 (1.1-1.6)  | 0.024 | 1.4 (1.1-1.8)  | 0.007 |
| <b>MCP-3</b>                    | 0.012**   | 1.3 (1.1-1.6)  | 0.01  | 1.1 (0.9-1.3)  | ns    |
| <b>MIP-1<math>\beta</math></b>  | 0.035     | 1.4 (1.1-1.9)  | 0.036 | 1.3 (0.9-1.7)  | ns    |
| <b>MIP-3<math>\alpha</math></b> | 0.013**   | 1.5 (1.1-1.9)  | 0.012 | 1.1 (0.8-1.5)  | ns    |
| <b>Fractalkine</b>              | < 0.001** | 1.3 (1.1-1.5)  | 0.004 | 1.3 (1.1-1.5)  | 0.003 |
| <b>CTACK</b>                    | 0.004**   | 1.29 (1.1-1.5) | 0.009 | 1.27 (1.1-1.5) | 0.033 |

| <b>CCG<br/>downregulated</b> | <b><i>P</i> ANOVA</b> | <b>Fold Change<br/>Decrease (95% CI)</b> | <b><i>P</i> Tukey</b> | <b>Fold Change<br/>Decrease (95%<br/>CI)</b> | <b><i>P</i> Tukey</b> |
|------------------------------|-----------------------|------------------------------------------|-----------------------|----------------------------------------------|-----------------------|
| <b>Tie-2</b>                 | <0.001**              | 1.4 (1.2-1.5)                            | <0.001                | 1.3 (1.1-1.5)                                | 0.001                 |

HCW: Health care workers

\*\*FDR-corrected significance (q-value) <0.05

**Supplementary Table S4: Alterations in CCGs levels in SARS-CoV-2-exposed individuals compared to unexposed individuals.** A) healthcareworkers (HCWs), B) solid cancer patients and C) haematological malignancy patients. T-test was performed on Log10 transformed data.

**A. Health care workers (exposed versus non-exposed)**

| Upregulated CCG                | Fold increase (95% CI) | P value   | Downregulate d CCG | Fold decrease (95% CI) | P value   |
|--------------------------------|------------------------|-----------|--------------------|------------------------|-----------|
| <b>TNF-<math>\alpha</math></b> | 1.4 (1.2-1.7)          | < 0.001** | <b>IP-10</b>       | 1.5 (1.2-2.0)          | 0.004**   |
| <b>IL-6</b>                    | 1.2 (1.0-1.3)          | 0.011     | <b>PlGF</b>        | 1.3 (1.0-1.7)          | 0.048     |
| <b>IL-1Ra</b>                  | 2.0 (1.4-2.9)          | 0.001**   | <b>Tie-2</b>       | 1.7 (1.4-2.1)          | < 0.001** |
| <b>SAA</b>                     | 1.5 (1.0-2.0)          | 0.032     |                    |                        |           |
| <b>IFN-<math>\gamma</math></b> | 11.8 (5.6-25.0)        | < 0.001** |                    |                        |           |
| <b>IL-18</b>                   | 1.4 (1.0-2.0)          | 0.0496    |                    |                        |           |
| <b>IL-17F</b>                  | 3.0 (1.1-8.1)          | 0.039     |                    |                        |           |
| <b>IL-33</b>                   | 1.2 (1.1-1.3)          | < 0.001** |                    |                        |           |
| <b>IL-13</b>                   | 1.6 (1.1-2.3)          | 0.009**   |                    |                        |           |
| <b>IL-5</b>                    | 1.2 (1.0-1.3)          | 0.046     |                    |                        |           |
| <b>TSLP</b>                    | 1.2 (1.0-1.5)          | 0.044     |                    |                        |           |
| <b>IL-21</b>                   | 1.8 (1.2-2.7)          | 0.005**   |                    |                        |           |
| <b>IL-10</b>                   | 1.1 (1.0-1.2)          | 0.003**   |                    |                        |           |
| <b>IL-2</b>                    | 1.9 (1.1-3.4)          | 0.032     |                    |                        |           |
| <b>G-CSF</b>                   | 1.4 (1.1-1.8)          | 0.004**   |                    |                        |           |
| <b>GM-CSF</b>                  | 1.1 (1.0-1.2)          | 0.031     |                    |                        |           |
| <b>MCP-1</b>                   | 1.4 (1.1-1.7)          | 0.003**   |                    |                        |           |

**B. Solid cancer patients (exposed versus non-exposed)**

| Upregulated CCG | Fold increase (95% CI) | P value | Downregulate d CCG                  | Fold decrease (95% CI) | P value |
|-----------------|------------------------|---------|-------------------------------------|------------------------|---------|
| <b>SAA</b>      | 2.5 (1.1-5.6)          | 0.026   | <b>BDNF</b>                         | 3.7 (1.7-8.0)          | 0.002   |
| <b>CRP</b>      | 2.1 (1.1-4.0)          | 0.035   | <b>bFGF</b>                         | 2.9 (1.3-6.3)          | 0.012   |
| <b>IL-2</b>     | 1.9 (1.2-3.0)          | 0.006   | <b>VEGF-C</b>                       | 1.9 (1.2-3.0)          | 0.011   |
| <b>MCP-3</b>    | 1.3 (1.1-1.7)          | 0.008   | <b>Total TGF-<math>\beta</math></b> | 1.8 (1.0-3.1)          | 0.047   |
|                 |                        |         | <b>IL-9</b>                         | 1.2 (1.0-1.4)          | 0.028   |

**C. Haematological patients (exposed versus non-exposed)**

| Upregulated CCG                | Fold increase (95% CI) | P value |
|--------------------------------|------------------------|---------|
| <b>SAA</b>                     | 3.1 (1.4-6.9)          | 0.010** |
| <b>IFN-<math>\beta</math></b>  | 2.7 (1.3-5.6)          | 0.011   |
| <b>IP-10</b>                   | 2.5 (1.5-4.4)          | 0.002** |
| <b>CRP</b>                     | 2.4 (1.2-4.7)          | 0.02    |
| <b>TSLP</b>                    | 1.4 (1.1-1.9)          | 0.017** |
| <b>TNF-<math>\alpha</math></b> | 1.3 (1.0-1.5)          | 0.032** |
| <b>sVCAM-1</b>                 | 1.1 (1.0-1.2)          | 0.017** |

\* T-test was performed on log10 transformed data.

\*\* FDR-corrected significance (q-value) <0.05

|                     | Solid cancer<br>(n = 45) (n(%)) | Haematological<br>cancer (n = 17) (n(%)) | HCWs<br>(n = 19) (n(%)) | statistics* |
|---------------------|---------------------------------|------------------------------------------|-------------------------|-------------|
| <b>Asymptomatic</b> | 10 (22.2%)                      | 5 (29.4%)                                | 7 (36.8%)               | ns          |
| <b>Mild</b>         | 19 (42.2%)                      | 7 (41.2%)                                | 10 (52.6%)              | ns          |
| <b>Moderate</b>     | 3 (6.7%)                        | 2 (11.8%)                                | 0 (0%)                  | ns          |
| <b>Severe</b>       | 8 (17.8%)                       | 2 (11.8%)                                | 2 (10.5%)               | ns          |
| <b>Critical</b>     | 1 (2.2%)                        | 1 (5.9%)                                 | 0 (0%)                  | ns          |
| <b>Death</b>        | 4 (8.9%)                        | 0 (0%)                                   | 0 (0%)                  | ns          |

\* Fisher's exact test

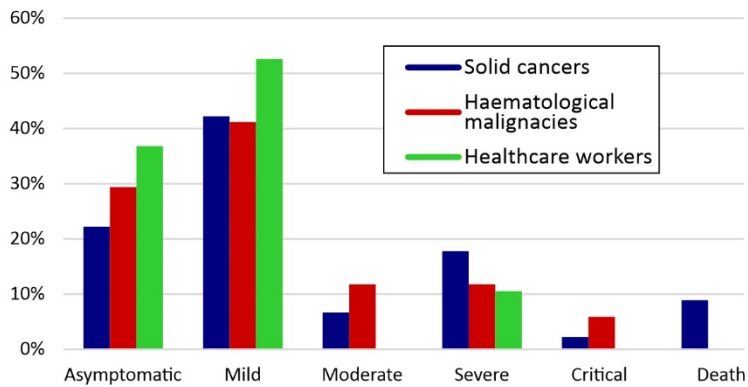

**Supplementary Figure S1:** Proportion of patients according to severity in solid and haematological malignancies as well as HCWs. The upper panel shows the precise numbers and the statistics.



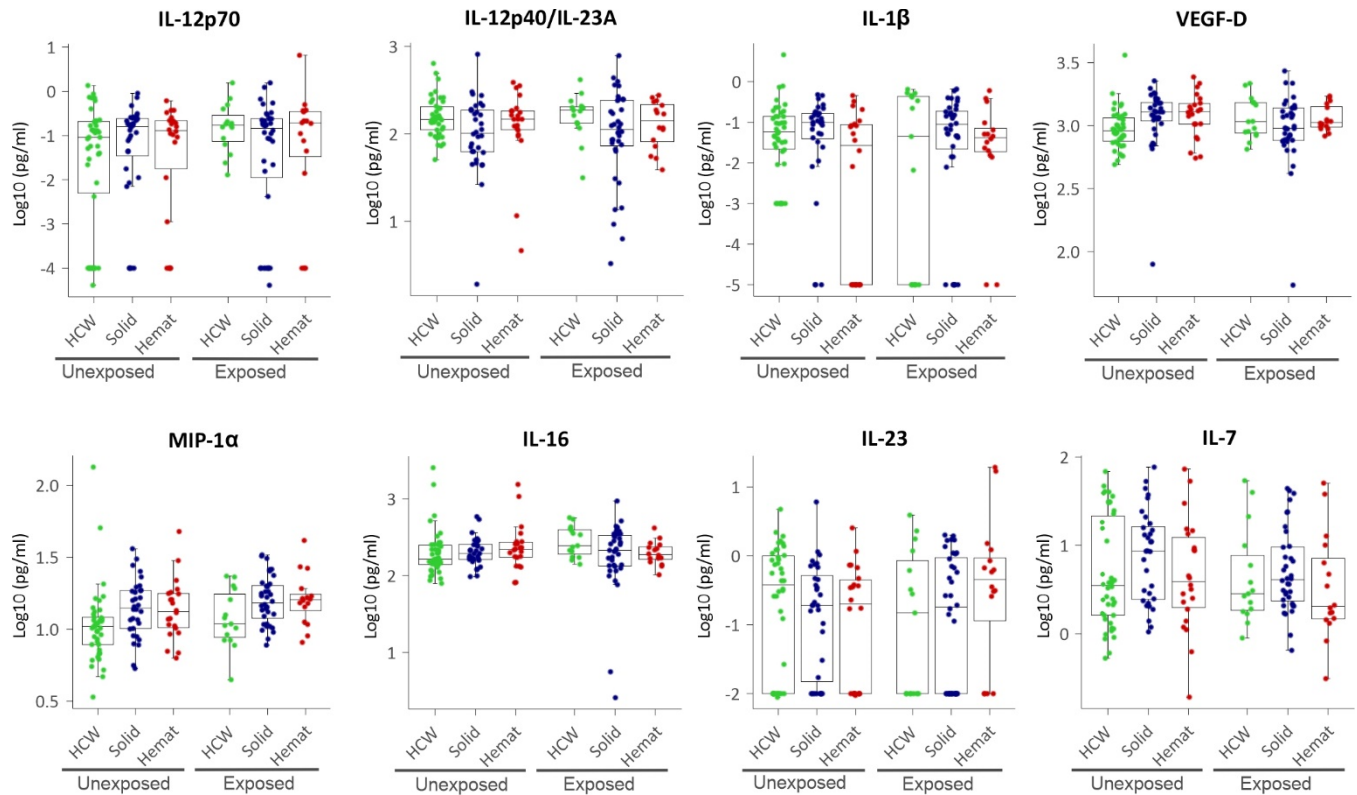

**Supplementary Figure S2. Plasma levels of additional CCGs.** HCW, health care workers (green), Solid, patients with solid tumours (blue), Hemat, patients with haematological malignancies (red). Each dot represents the sample closest to exposure in case of exposed patients, and an average of multiple timepoints, when available, for unexposed patients.

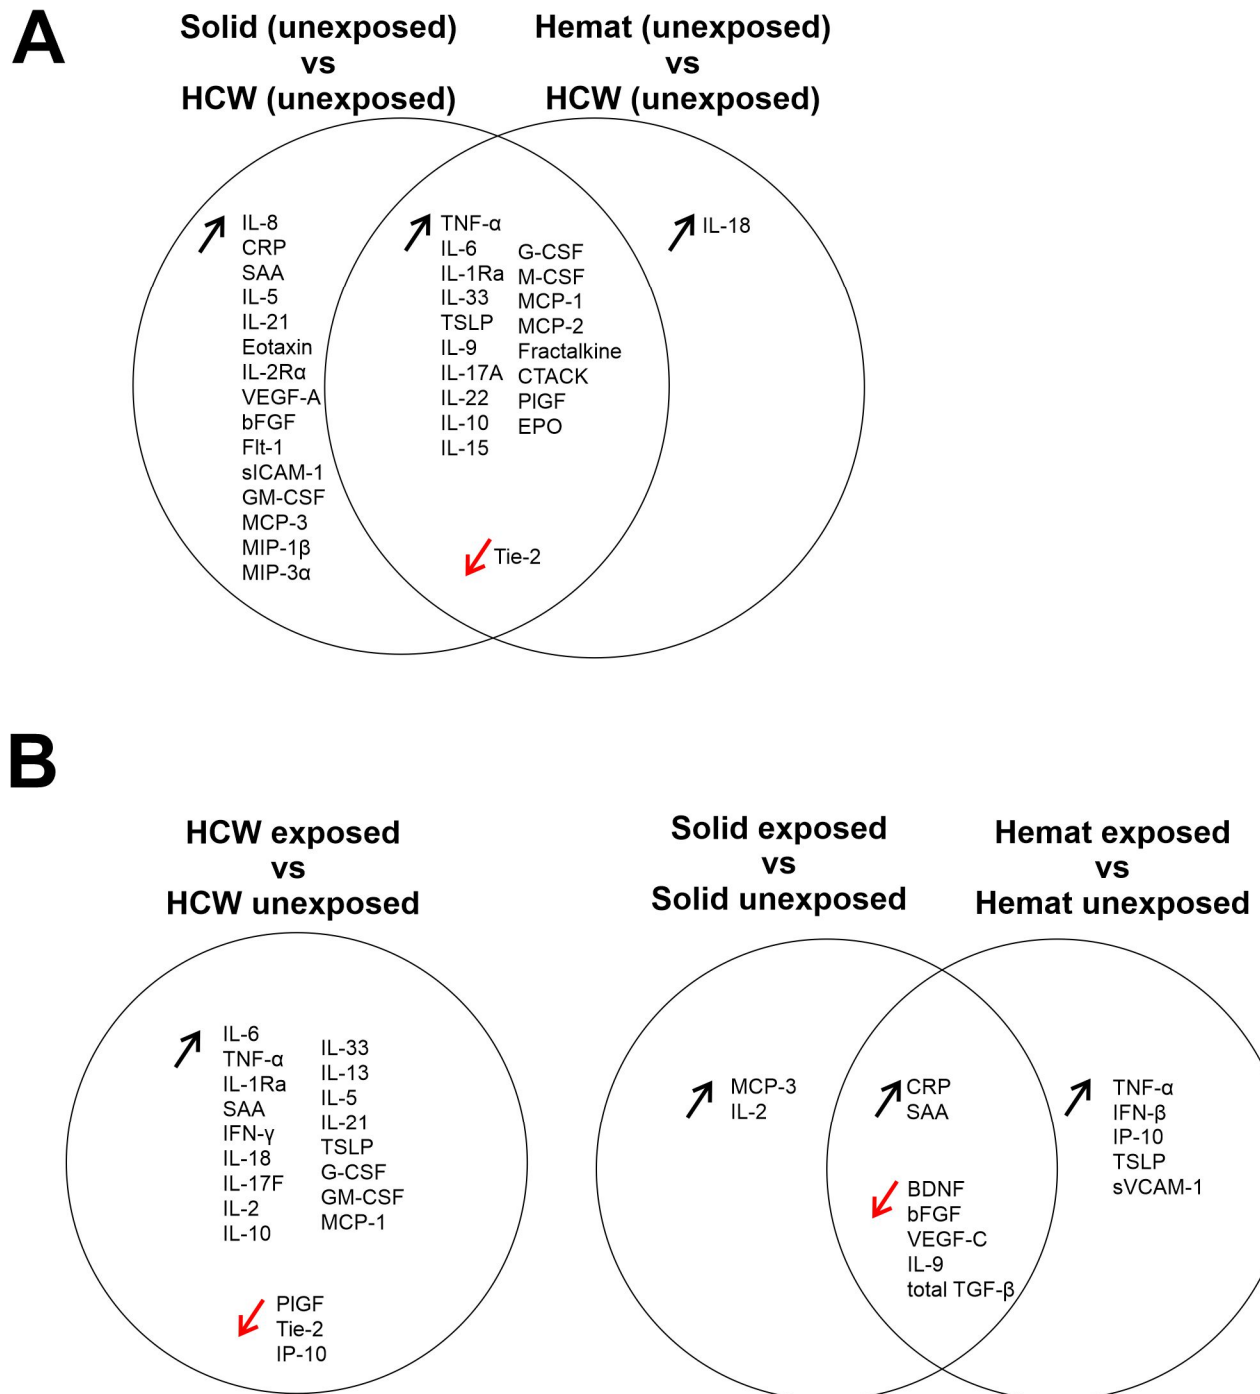

**Supplementary Figure S3:** Summarising figure showing cytokines significantly increased and decreased **A)** in relatively unexposed patients with solid cancers and with haematological malignancies compared to unexposed HCWs. **B)** Cytokines significantly increased and decreased in HCWs exposed to SARS-CoV-2 compared to unexposed HCWs and increased and decreased in SARS-CoV-2 exposed solid and haematological malignancy patients compared to

unexposed solid and haematological malignancy patients. HCW, health care workers, Solid, patients with solid tumours, Hemat, patients with haematological malignancies.
